# Supplementary material
Source: ML conference proceedings conference paper supplement (https://openreview.net/forum?id=mekyxmlLJNd)
Supplement: supplementary_material [file attachment]

## 1 Proof

**Proposition 1.** Let  $\eta_t = 1/t$ . Assume  $\gamma < 1/\sigma_{\mathbf{x}}^2$ . Both  $\psi_t$  in MAML (with one inner gradient step) and  $\theta_t$  in CommonMean converge to  $\bar{\mathbf{w}} = \mathbb{E}_{\tau} \mathbf{w}_{\tau}^*$ .

**Proposition 2.** Assume that  $\gamma < 1/\sigma_{\mathbf{x}}^2$ . We have  $\bar{\mathbf{w}} = \operatorname{argmin}_{\boldsymbol{\theta}} \mathbb{E}_{\tau} \mathbb{E}_{S_{\tau}} \mathbb{E}_{Q_{\tau}} \sum_{(\mathbf{x}, y) \in Q_{\tau}} (\mathbf{x}^{\top} \mathbf{w}_{\tau}^{(\text{prox})} - y)^2 = \operatorname{argmin}_{\boldsymbol{\psi}} \mathbb{E}_{\tau} \mathbb{E}_{S_{\tau}} \mathbb{E}_{Q_{\tau}} \sum_{(\mathbf{x}, y) \in Q_{\tau}} (\mathbf{x}^{\top} \mathbf{w}_{\tau}^{(\text{gd})} - y)^2$ .

We first prove Proposition 2 that the mean regressor is the unique minimizer. Then, we prove Proposition 1 by showing that MAML (with one inner gradient step) and CommonMean algorithms achieve global convergence.

### 1.1 Proof of Proposition 2

*Proof.* For each task  $\tau$ , let  $\mathbf{v}_{\tau} = \mathbf{w}_{\tau}^* - \bar{\mathbf{w}}$ , then  $\{\mathbf{v}_{\tau}\}$  are i.i.d. random variables with zero mean. Denote  $\mathbf{C}_{\tau} = (\lambda \mathbf{I} + \mathbf{X}_{\tau}^{\top} \mathbf{X}_{\tau})^{-1}$ . As  $\mathbf{w}_{\tau}^{(\text{prox})} = \mathbf{C}_{\tau} (\lambda \boldsymbol{\theta} + \mathbf{X}_{\tau}^{\top} \mathbf{y}_{\tau})$  and  $\mathbf{y}_{\tau} = \mathbf{X}_{\tau} \mathbf{w}_{\tau}^* + \boldsymbol{\xi}_{\tau}$ , it follows that

$$\begin{aligned}
& \mathbb{E}_{\tau} \mathbb{E}_{S_{\tau}} \mathbb{E}_{Q_{\tau}} \sum_{(\mathbf{x}, y) \in Q_{\tau}} (\mathbf{x}^{\top} \mathbf{w}_{\tau}^{(\text{prox})} - y)^2 \\
&= \mathbb{E}_{\tau} \mathbb{E}_{S_{\tau}} \mathbb{E}_{Q_{\tau}} \sum_{(\mathbf{x}, y) \in Q_{\tau}} (\lambda \mathbf{x}^{\top} \mathbf{C}_{\tau} \boldsymbol{\theta} + \mathbf{x}^{\top} \mathbf{C}_{\tau} \mathbf{X}_{\tau}^{\top} (\mathbf{X}_{\tau} \mathbf{w}_{\tau}^* + \boldsymbol{\xi}_{\tau}) - \mathbf{x}^{\top} \mathbf{w}_{\tau}^* - \xi)^2 \\
&= \mathbb{E}_{\tau} \mathbb{E}_{S_{\tau}} \mathbb{E}_{Q_{\tau}} \sum_{(\mathbf{x}, y) \in Q_{\tau}} (\lambda \mathbf{x}^{\top} \mathbf{C}_{\tau} \boldsymbol{\theta} + \mathbf{x}^{\top} \mathbf{C}_{\tau} \mathbf{X}_{\tau}^{\top} (\mathbf{X}_{\tau} \bar{\mathbf{w}} + \mathbf{X}_{\tau} \mathbf{v}_{\tau} + \boldsymbol{\xi}_{\tau}) - \mathbf{x}^{\top} \bar{\mathbf{w}} - \mathbf{x}^{\top} \mathbf{v}_{\tau} - \xi)^2 \\
&= \mathbb{E}_{\tau} \mathbb{E}_{S_{\tau}} \mathbb{E}_{Q_{\tau}} \sum_{(\mathbf{x}, y) \in Q_{\tau}} (\lambda \mathbf{x}^{\top} \mathbf{C}_{\tau} \boldsymbol{\theta} + \mathbf{x}^{\top} \mathbf{C}_{\tau} \mathbf{X}_{\tau}^{\top} \mathbf{X}_{\tau} \bar{\mathbf{w}} - \mathbf{x}^{\top} \bar{\mathbf{w}})^2 + \text{constant} \\
&= \mathbb{E}_{\tau} \mathbb{E}_{S_{\tau}} \mathbb{E}_{Q_{\tau}} \sum_{(\mathbf{x}, y) \in Q_{\tau}} (\lambda \mathbf{x}^{\top} \mathbf{C}_{\tau} (\boldsymbol{\theta} - \bar{\mathbf{w}}))^2 + \text{constant} \\
&= \lambda^2 \sigma_{\mathbf{x}}^2 n_q \mathbb{E}_{\tau} \mathbb{E}_{S_{\tau}} (\boldsymbol{\theta} - \bar{\mathbf{w}})^{\top} \mathbf{C}_{\tau}^2 (\boldsymbol{\theta} - \bar{\mathbf{w}}) + \text{constant},
\end{aligned} \tag{1}$$

where we have used the setting that  $\mathbf{x}, \xi, \mathbf{X}_{\tau}, \boldsymbol{\xi}_{\tau}$ , and  $\mathbf{v}_{\tau}$  are independent to obtain (1). Since  $\mathbb{E}_{\tau} \mathbb{E}_{S_{\tau}} \mathbf{C}_{\tau}^2 \succeq \lambda^{-2} \mathbf{I}$ , we conclude that  $\boldsymbol{\theta} = \bar{\mathbf{w}}$  is the unique optima.

For MAML with one gradient step  $\mathbf{w}_{\tau}^{(\text{gd})} = \boldsymbol{\psi} - \gamma \mathbf{X}_{\tau}^{\top} (\mathbf{X}_{\tau} \boldsymbol{\psi} - \mathbf{y}_{\tau})$ , it follows that

$$\begin{aligned}
& \mathbb{E}_{\tau} \mathbb{E}_{S_{\tau}} \mathbb{E}_{Q_{\tau}} \sum_{(\mathbf{x}, y) \in Q_{\tau}} (\mathbf{x}^{\top} \mathbf{w}_{\tau}^{(\text{gd})} - y)^2 \\
&= \mathbb{E}_{\tau} \mathbb{E}_{S_{\tau}} \mathbb{E}_{Q_{\tau}} \sum_{(\mathbf{x}, y) \in Q_{\tau}} (\mathbf{x}^{\top} (\mathbf{I} - \gamma \mathbf{X}_{\tau}^{\top} \mathbf{X}_{\tau}) \boldsymbol{\psi} + \gamma \mathbf{x}^{\top} \mathbf{X}_{\tau}^{\top} \mathbf{y}_{\tau} - y)^2 \\
&= \mathbb{E}_{\tau} \mathbb{E}_{S_{\tau}} \mathbb{E}_{Q_{\tau}} \sum_{(\mathbf{x}, y) \in Q_{\tau}} (\mathbf{x}^{\top} (\mathbf{I} - \gamma \mathbf{X}_{\tau}^{\top} \mathbf{X}_{\tau}) \boldsymbol{\psi} + \gamma \mathbf{x}^{\top} \mathbf{X}_{\tau}^{\top} (\mathbf{X}_{\tau} \bar{\mathbf{w}} + \mathbf{X}_{\tau} \mathbf{v}_{\tau} + \boldsymbol{\xi}_{\tau}) - \mathbf{x}^{\top} \bar{\mathbf{w}} - \mathbf{x}^{\top} \mathbf{v}_{\tau} - \xi)^2 \\
&= \mathbb{E}_{\tau} \mathbb{E}_{S_{\tau}} \mathbb{E}_{Q_{\tau}} \sum_{(\mathbf{x}, y) \in Q_{\tau}} (\mathbf{x}^{\top} (\mathbf{I} - \gamma \mathbf{X}_{\tau}^{\top} \mathbf{X}_{\tau}) (\boldsymbol{\psi} - \bar{\mathbf{w}}))^2 + \text{constant} \\
&= n_q \sigma_{\mathbf{x}}^2 \mathbb{E}_{\tau} \mathbb{E}_{S_{\tau}} \|(\mathbf{I} - \gamma \mathbf{X}_{\tau}^{\top} \mathbf{X}_{\tau}) (\boldsymbol{\psi} - \bar{\mathbf{w}})\|^2 + \text{constant}.
\end{aligned}$$

As  $\gamma < 1/\sigma_{\mathbf{x}}^2$ , we conclude that  $\boldsymbol{\psi} = \bar{\mathbf{w}}$  is the unique optima.  $\square$

### 1.2 Proof of Proposition 1

*Proof.* (i) Notice that  $\mathbf{w}_{\tau}^{(\text{prox})}$  is affine in  $\boldsymbol{\theta}$ , thus,  $\mathbb{E}_{\tau} \mathbb{E}_{S_{\tau}} \mathbb{E}_{Q_{\tau}} \sum_{(\mathbf{x}, y) \in Q_{\tau}} (\mathbf{x}^{\top} \mathbf{w}_{\tau}^{(\text{prox})} - y)^2$  is convex in  $\boldsymbol{\theta}$ . The CommonMean algorithm is using stochastic gradient descent to minimize the population risk, and the global convergence of  $\theta_t$  follows from the stochastic convex optimization [1].

(ii) Similarly,  $\mathbf{w}_{\tau}^{(\text{gd})}$  is affine in  $\boldsymbol{\psi}$ , thus, the loss  $\mathbb{E}_{\tau} \mathbb{E}_{S_{\tau}} \mathbb{E}_{Q_{\tau}} \sum_{(\mathbf{x}, y) \in Q_{\tau}} (\mathbf{x}^{\top} \mathbf{w}_{\tau}^{(\text{gd})} - y)^2$  is convex in  $\boldsymbol{\psi}$ . Using stochastic gradient descent,  $\psi_t$  achieves global convergence [1]. By Proposition 2,  $\bar{\mathbf{w}}$  is the unique optima, and we finish the proof.  $\square$

### 1.3 Proof of Proposition 4

The task index  $\tau'$  will be omitted for simplifying notations in Proposition 4.

**Proposition 4.**  $\mathbb{E}_{\xi} \|\mathbf{w}^{(\text{prox})} - \mathbf{w}^*\|^2 = \|\tilde{\mathbf{b}}\|^2 + \sum_{j=1}^{n_s} \left( \frac{\lambda \tilde{a}_j}{\lambda + \nu_j^2} \right)^2 + \sum_{j=1}^{n_s} \left( \frac{\sigma_{\xi}}{(\lambda/\nu_j) + \nu_j} \right)^2$ , where the expectation is over the label noise vector  $\xi$ .

*Proof.* The ridge regression has a closed-form solution  $\mathbf{w}^{(\text{prox})} = (\lambda \mathbf{I} + \mathbf{X}^\top \mathbf{X})^{-1} (\lambda \boldsymbol{\theta} + \mathbf{X}^\top \mathbf{y})$ . Using the SVD decomposition of  $\mathbf{X} = \mathbf{U} \boldsymbol{\Sigma} \mathbf{V}^\top$  and  $\mathbf{y} = \mathbf{X} \mathbf{w}^* + \xi$ , we obtain

$$\begin{aligned} \mathbf{w}^{(\text{prox})} &= (\mathbf{I} + \lambda^{-1} \mathbf{V} \boldsymbol{\Sigma}^2 \mathbf{V}^\top)^{-1} (\mathbf{V} \mathbf{a}_0 + \mathbf{V}^\perp \mathbf{b}_0 + \lambda^{-1} \mathbf{V} \boldsymbol{\Sigma} \mathbf{U}^\top \mathbf{y}) \\ &= (\mathbf{I} + \lambda^{-1} \mathbf{V} \boldsymbol{\Sigma}^2 \mathbf{V}^\top)^{-1} (\mathbf{V} \mathbf{a}_0 + \mathbf{V}^\perp \mathbf{b}_0 + \lambda^{-1} \mathbf{V} \boldsymbol{\Sigma}^2 \mathbf{a}^* + \lambda^{-1} \mathbf{V} \boldsymbol{\Sigma} \mathbf{U} \xi) \end{aligned} \quad (2)$$

$$= \mathbf{V}^\perp \mathbf{b}_0 + \mathbf{V} (\mathbf{I} + \lambda^{-1} \boldsymbol{\Sigma}^2)^{-1} (\mathbf{a}_0 + \lambda^{-1} \boldsymbol{\Sigma}^2 \mathbf{a}^*) + \mathbf{V} (\lambda \boldsymbol{\Sigma}^{-1} + \boldsymbol{\Sigma})^{-1} \mathbf{U}^\top \xi, \quad (3)$$

where we have used  $\mathbf{U}^\top \mathbf{y} = \mathbf{U}^\top (\mathbf{X} \mathbf{w}^* + \xi) = \mathbf{U}^\top \mathbf{U} \boldsymbol{\Sigma} \mathbf{V}^\top (\mathbf{V} \mathbf{a}^* + \mathbf{V}^\perp \mathbf{b}^*) + \mathbf{U}^\top \xi = \boldsymbol{\Sigma} \mathbf{a}^* + \mathbf{U}^\top \xi$  in (2) and the Woodbury identity in (3). Then the estimation error is

$$\mathbf{w}^{(\text{prox})} - \mathbf{w}^* = \mathbf{V}^\perp (\mathbf{b}_0 - \mathbf{b}^*) + \mathbf{V} (\mathbf{I} + \lambda^{-1} \boldsymbol{\Sigma}^2)^{-1} (\mathbf{a}_0 - \mathbf{a}^*) + \mathbf{V} (\lambda \boldsymbol{\Sigma}^{-1} + \boldsymbol{\Sigma})^{-1} \mathbf{U}^\top \xi.$$

Taking the square  $\ell_2$ -norm and then expectation over  $\xi$  on both sides, we have

$$\begin{aligned} &\mathbb{E}_{\xi} \|\mathbf{w}^{(\text{prox})} - \mathbf{w}^*\|^2 \\ &= \|\mathbf{V}^\perp (\mathbf{b}_0 - \mathbf{b}^*)\|^2 + \|\mathbf{V} (\mathbf{I} + \lambda^{-1} \boldsymbol{\Sigma}^2)^{-1} (\mathbf{a}_0 - \mathbf{a}^*)\|^2 + \mathbb{E}_{\xi} \|\mathbf{V} (\lambda \boldsymbol{\Sigma}^{-1} + \boldsymbol{\Sigma})^{-1} \mathbf{U}^\top \xi\|^2 \quad (4) \\ &= \|\mathbf{b}_0 - \mathbf{b}^*\|^2 + \|(\mathbf{I} + \lambda^{-1} \boldsymbol{\Sigma}^2)^{-1} (\mathbf{a}_0 - \mathbf{a}^*)\|^2 + \mathbb{E}_{\xi} \|(\lambda \boldsymbol{\Sigma}^{-1} + \boldsymbol{\Sigma})^{-1} \mathbf{U}^\top \xi\|^2 \\ &= \|\tilde{\mathbf{b}}\|^2 + \sum_{j=1}^{n_s} \left( \frac{\lambda \tilde{a}_j}{\lambda + \nu_j^2} \right)^2 + \sum_{j=1}^{n_s} \left( \frac{\nu_j \sigma_{\xi}}{\lambda + \nu_j^2} \right)^2, \end{aligned}$$

where (4) follows from the fact that  $\mathbf{V}^\perp$  is  $\mathbf{V}$ 's orthogonal complement and  $\xi$  is independent with  $\mathbf{X}$  (also the  $\boldsymbol{\Sigma}$ ,  $\mathbf{U}$  and  $\mathbf{V}$ ).  $\square$

### 1.4 Proof of Theorem 1

**Lemma 1.**  $\mathcal{L}_{\text{meta}}(\boldsymbol{\theta}, \phi)$  is Lipschitz-smooth w.r.t.  $(\boldsymbol{\theta}, \phi)$  with a Lipschitz constant  $\beta_{\text{meta}}$ .

Lipschitz-smoothness is a basic assumption to establish convergence of gradient descent algorithms in stochastic non-convex optimization [4, 8] and meta-learning in non-convex settings [2, 11].

*Proof of Lemma 1.* As  $\mathcal{L}_{\text{meta}}(\boldsymbol{\theta}, \phi) \equiv \sum_{\tau \in \mathcal{T}} \sum_{(\mathbf{x}, y) \in Q_{\tau}} \ell(\hat{y}, y)$ , it suffices to show that  $\ell(\hat{y}, y)$  is Lipschitz-smooth in  $(\boldsymbol{\theta}, \phi)$ .

Using the chain rule, we have

$$\nabla_{(\boldsymbol{\theta}, \phi)} \ell(\hat{y}, y) = \nabla_1 \ell(\hat{y}, y) \nabla_{(\boldsymbol{\theta}, \phi)} \hat{y}, \quad (5)$$

$$\nabla_{(\boldsymbol{\theta}, \phi)} \hat{y} = \nabla_{(\boldsymbol{\theta}, \phi)} f_{\boldsymbol{\theta}}(\mathbf{z}) + (\nabla_{(\boldsymbol{\theta}, \phi)} \mathcal{K}(\mathbf{Z}_{\tau}, \mathbf{z}))^\top \boldsymbol{\alpha}_{\tau} + (\nabla_{(\boldsymbol{\theta}, \phi)} \boldsymbol{\alpha}_{\tau})^\top \mathcal{K}(\mathbf{Z}_{\tau}, \mathbf{z}). \quad (6)$$

The Lipschitz properties of direct derivatives  $\nabla_1 \ell(\hat{y}, y)$ ,  $\nabla_{(\boldsymbol{\theta}, \phi)} f_{\boldsymbol{\theta}}(\mathbf{z})$ ,  $\nabla_{(\boldsymbol{\theta}, \phi)} \mathcal{K}(\mathbf{Z}_{\tau}, \mathbf{z})$ , and  $\mathcal{K}(\mathbf{Z}_{\tau}, \mathbf{z})$  follow from the Assumption 1. It remains to claim  $\boldsymbol{\alpha}_{\tau}$  and  $\nabla_{(\boldsymbol{\theta}, \phi)} \boldsymbol{\alpha}_{\tau}$  are Lipschitz. Let  $\mathbf{p} = [f_{\boldsymbol{\theta}}(\mathbf{z}_1); \dots; f_{\boldsymbol{\theta}}(\mathbf{z}_{n_s}); \mathcal{K}(\mathbf{Z}_{\tau}, \mathbf{z}_1); \dots; \mathcal{K}(\mathbf{Z}_{\tau}, \mathbf{z}_{n_s})] \in \mathbb{R}^{n_s + n_s^2}$  be the input of the dual problem.

(i) Claim:  $\boldsymbol{\alpha}_{\tau}$  is Lipschitz w.r.t.  $(\boldsymbol{\theta}, \phi)$  and  $\boldsymbol{\alpha}_{\tau}(\mathbf{p})$  is Lipschitz-smooth w.r.t.  $\mathbf{p}$ . To show  $\boldsymbol{\alpha}_{\tau}$  is Lipschitz w.r.t.  $(\boldsymbol{\theta}, \phi)$ , it suffices to show that  $\|\nabla_{(\boldsymbol{\theta}, \phi)} \boldsymbol{\alpha}_{\tau}\|$  is bounded. By the chain rule,  $\nabla_{(\boldsymbol{\theta}, \phi)} \boldsymbol{\alpha}_{\tau} = \nabla_{\mathbf{p}} \boldsymbol{\alpha}_{\tau} \nabla_{(\boldsymbol{\theta}, \phi)} \mathbf{p}$ . Denote the dual objective by  $g(\mathbf{p}, \boldsymbol{\alpha})$ . By the implicit function theorem [9],  $\nabla_{\mathbf{p}} \boldsymbol{\alpha}_{\tau} = -(\nabla_{\boldsymbol{\alpha}}^2 g(\mathbf{p}, \boldsymbol{\alpha}_{\tau}))^{-1} \frac{\partial^2}{\partial \mathbf{p} \partial \boldsymbol{\alpha}} g(\mathbf{p}, \boldsymbol{\alpha}_{\tau})$ , where  $\nabla_{\boldsymbol{\alpha}}^2 g(\mathbf{p}, \boldsymbol{\alpha}_{\tau}) = \sum_{(x_i, y_i) \in S_{\tau}} \nabla_1^2 \ell(f_{\boldsymbol{\theta}}(\mathbf{z}_i), y_i) \mathcal{K}(\mathbf{Z}_{\tau}, \mathbf{z}_i) \mathcal{K}(\mathbf{Z}_{\tau}, \mathbf{z}_i)^\top + \mathcal{K}(\mathbf{Z}_{\tau}, \mathbf{Z}_{\tau})$ ,  $\frac{\partial^2}{\partial \mathbf{p} \partial \boldsymbol{\alpha}} g(\mathbf{p}, \boldsymbol{\alpha}_{\tau}) = [\mathcal{K}(\mathbf{Z}_{\tau}, \mathbf{Z}_{\tau}) \mathbf{D} \mid (\mathcal{K}(\mathbf{Z}_{\tau}, \mathbf{Z}_{\tau}) \mathbf{D}) \otimes \boldsymbol{\alpha}_{\tau}^\top + \mathbf{v}^\top \otimes \mathbf{I} + \mathbf{I} \otimes \boldsymbol{\alpha}_{\tau}^\top]$ ,  $\mathbf{D} =$

$\text{diag}([\nabla_1^2 \ell(f_\tau(\mathbf{z}_1), y_1); \dots; \nabla_1^2 \ell(f_\tau(\mathbf{z}_{n_s}), y_{n_s})])$ ,  $\mathbf{v} = [\nabla_1 \ell(f_\tau(\mathbf{z}_1), y_1); \dots; \nabla_1 \ell(f_\tau(\mathbf{z}_{n_s}), y_{n_s})]$ , where  $\otimes$  is the Kronecker product. It follows from the Assumption 1 that both  $\nabla_{\alpha}^2 g(\mathbf{p}, \alpha_\tau)$  and  $\frac{\partial^2}{\partial \mathbf{p} \partial \alpha} g(\mathbf{p}, \alpha_\tau)$  are Lipschitz w.r.t.  $\mathbf{p}$ . Hence, we conclude that  $\nabla_{\mathbf{p}} \alpha_\tau(\mathbf{p})$  is Lipschitz,  $\alpha_\tau(\mathbf{p})$  is Lipschitz-smooth w.r.t.  $\mathbf{p}$ , and  $\|\nabla_{\mathbf{p}} \alpha_\tau(\mathbf{p})\|$  is bounded. Again, the boundedness of  $\nabla_{(\theta, \phi)} \mathbf{p}$  follows from the Lipschitz-smoothness of  $\mathbf{p}$  w.r.t.  $(\theta, \phi)$ . We conclude that  $\alpha_\tau$  is Lipschitz w.r.t.  $(\theta, \phi)$ .

(ii) Claim:  $\nabla_{(\theta, \phi)} \alpha_\tau$  is Lipschitz w.r.t.  $(\theta, \phi)$ . Given  $(\theta, \phi)$  and  $(\theta', \phi')$ , we show  $\|\nabla_{(\theta, \phi)} \alpha_\tau(\theta, \phi) - \nabla_{(\theta, \phi)} \alpha_\tau(\theta', \phi')\| \leq \beta \|(\theta, \phi) - (\theta', \phi')\|$  for some  $\beta > 0$ . For notation simplicity, let  $\varphi = (\theta, \phi)$  and  $\varphi' = (\theta', \phi')$ , then we have

$$\begin{aligned} & \|\nabla_{\varphi} \alpha_\tau(\varphi) - \nabla_{\varphi} \alpha_\tau(\varphi')\| \\ &= \|\nabla_{\mathbf{p}} \alpha_\tau(\mathbf{p}(\varphi)) \nabla_{\varphi} \mathbf{p}(\varphi) - \nabla_{\mathbf{p}} \alpha_\tau(\mathbf{p}(\varphi')) \nabla_{\varphi} \mathbf{p}(\varphi')\| \\ &= \|\nabla_{\mathbf{p}} \alpha_\tau(\mathbf{p}(\varphi)) \nabla_{\varphi} \mathbf{p}(\varphi) - \nabla_{\mathbf{p}} \alpha_\tau(\mathbf{p}(\varphi')) \nabla_{\varphi} \mathbf{p}(\varphi') \pm \nabla_{\mathbf{p}} \alpha_\tau(\mathbf{p}(\varphi)) \nabla_{\varphi} \mathbf{p}(\varphi')\| \\ &\leq \|\nabla_{\mathbf{p}} \alpha_\tau(\mathbf{p}(\varphi))\| \|\nabla_{\varphi} \mathbf{p}(\varphi) - \nabla_{\varphi} \mathbf{p}(\varphi')\| + \|\nabla_{\varphi} \mathbf{p}(\varphi')\| \|\nabla_{\mathbf{p}} \alpha_\tau(\mathbf{p}(\varphi)) - \nabla_{\mathbf{p}} \alpha_\tau(\mathbf{p}(\varphi'))\|. \end{aligned}$$

As  $\mathbf{p}(\varphi)$  and  $\alpha_\tau(\mathbf{p})$  are Lipschitz-smooth, there exists  $\beta > 0$  such that

$$\begin{aligned} \|\nabla_{\varphi} \alpha_\tau(\varphi) - \nabla_{\varphi} \alpha_\tau(\varphi')\| &\leq \beta \|\varphi - \varphi'\| + \beta \|\mathbf{p}(\varphi) - \mathbf{p}(\varphi')\| \\ &\leq \beta \|\varphi - \varphi'\| + \beta \|\varphi - \varphi'\| \\ &= 2\beta \|\varphi - \varphi'\|. \end{aligned}$$

We conclude that  $\nabla_{\varphi} \alpha_\tau$  is Lipschitz.

By (i) and (ii),  $\ell$  is Lipschitz-smooth w.r.t. the meta-parameters  $\varphi$ . Therefore,  $\mathcal{L}_{\text{meta}}(\varphi)$  is Lipschitz-smooth w.r.t.  $\varphi$  with a Lipschitz constant  $\beta_{\text{meta}} > 0$ .  $\square$

**Theorem 1.** *Let the step size be  $\eta_t = \min(1/\sqrt{T}, 1/\beta_{\text{meta}})$ . Algorithm 3 satisfies  $\min_{1 \leq t \leq T} \mathbb{E} \|\nabla_{(\theta_t, \phi_t)} \mathcal{L}_{\text{meta}}(\theta_t, \phi_t)\|^2 = \mathcal{O}(\sigma_{\mathbf{g}}^2/\sqrt{T})$ , where the expectation is taken over the random training samples.*

The proof is similar to non-convex stochastic programming [4].

*Proof of Theorem 1.* Let  $\varphi = (\theta, \phi)$ . Let  $\zeta_t = \nabla_{\varphi_t} \mathcal{L}_{\text{meta}}(\varphi_t) - \frac{1}{b} \sum_{\tau \in \mathcal{B}_t} \mathbf{g}_\tau$ , where  $\frac{1}{b} \sum_{\tau \in \mathcal{B}_t} \mathbf{g}_\tau$  is an unbiased estimation of  $\nabla_{\varphi_t} \mathcal{L}_{\text{meta}}(\varphi_t)$ . Using the Taylor expansion, we have

$$\begin{aligned} & \mathcal{L}_{\text{meta}}(\varphi_{t+1}) \\ &\leq \mathcal{L}_{\text{meta}}(\varphi_t) + \nabla_{\varphi_t} \mathcal{L}_{\text{meta}}(\varphi_t)^\top (\varphi_{t+1} - \varphi_t) + \frac{1}{2} \beta_{\text{meta}} \|\varphi_{t+1} - \varphi_t\|^2 \\ &\leq \mathcal{L}_{\text{meta}}(\varphi_t) - \eta_t (1 - \frac{\beta_{\text{meta}} \eta_t}{2}) \|\nabla_{\varphi_t} \mathcal{L}_{\text{meta}}(\varphi_t)\|^2 + \eta_t \nabla_{\varphi_t}^\top \mathcal{L}_{\text{meta}}(\varphi_t) \zeta_t + \frac{1}{2} \beta_{\text{meta}} \eta_t^2 \sigma_{\mathbf{g}}^2. \end{aligned}$$

Taking conditional expectation over  $\zeta_{t-1}$  on both sides and then take the expectation over the random training samples, we have

$$\mathbb{E} \mathcal{L}_{\text{meta}}(\varphi_{t+1}) \leq \mathbb{E} \mathcal{L}_{\text{meta}}(\varphi_t) - \frac{\eta_t}{2} \mathbb{E} \|\nabla_{\varphi_t} \mathcal{L}_{\text{meta}}(\varphi_t)\|^2 + \frac{1}{2} \beta_{\text{meta}} \eta_t^2 \sigma_{\mathbf{g}}^2, \quad (7)$$

where we have used  $1 - \frac{\beta_{\text{meta}} \eta_t}{2} \geq \frac{1}{2}$ . Rearranging the above inequality and summing over  $t$ , we have

$$\sum_{t=1}^T \frac{\eta_t}{2} \mathbb{E} \|\nabla_{\varphi_t} \mathcal{L}_{\text{meta}}(\varphi_t)\|^2 \leq \mathbb{E} \mathcal{L}_{\text{meta}}(\varphi_1) + \beta_{\text{meta}} \sigma_{\mathbf{g}}^2 \sum_{t=1}^T \eta_t^2. \quad (8)$$

Since  $\eta_t = \min(1/\sqrt{T}, 1/2\beta_{\text{meta}})$ , we have  $\sum_{t=1}^T \eta_t^2 \leq 1$ . Diving both sides by  $1/\sqrt{T}$ , we conclude that  $\min_{1 \leq t \leq T} \mathbb{E} \|\nabla_{\varphi_t} \mathcal{L}_{\text{meta}}(\varphi_t)\|^2 = \mathcal{O}(\sigma_{\mathbf{g}}^2/\sqrt{T})$ .  $\square$

## 1.5 Proof of Theorem 2

**Theorem 2.** *Assume that  $\mathcal{M}(\theta, \phi)$  is uniform conditioning. (i) Let  $\eta_t = \min(1/\sqrt{T}, 1/2\beta_{\text{meta}})$ . Algorithm 3 satisfies  $\min_{1 \leq t \leq T} \mathbb{E} \mathcal{L}_{\text{meta}}(\theta_t, \phi_t) - \min_{(\theta, \phi)} \mathcal{L}_{\text{meta}}(\theta, \phi) = \mathcal{O}(\sigma_{\mathbf{g}}^2/\sqrt{T})$ , where the expectation is taken over the random training samples. (ii) Let  $\eta_t = \eta < \min(1/2\beta_{\text{meta}}, 4|\mathcal{T}|/\rho\mu)$  and  $\mathcal{B}_t = \mathcal{T}$ . Algorithm 3 satisfies  $\mathcal{L}_{\text{meta}}(\theta_t, \phi_t) - \min_{(\theta, \phi)} \mathcal{L}_{\text{meta}}(\theta, \phi) = \mathcal{O}((1 - \eta\rho\mu/4|\mathcal{T}|)^t)$ .*

*Proof of Theorem 2.* Let  $\varphi = (\theta, \phi)$ . By the chain rule, we have

$$\nabla_{\varphi} \mathcal{L}_{\text{meta}}(\varphi) = \frac{1}{|\mathcal{T}|} \sum_{\tau \in \mathcal{T}} \sum_{(\mathbf{x}, y) \in Q_{\tau}} \nabla_1 \ell(\hat{y}, y) \nabla_{\varphi} \hat{y} \quad (9)$$

$$= \frac{1}{|\mathcal{T}|} \mathcal{G}(\varphi)^{\top} \nabla_{\varphi} \mathcal{M}(\varphi), \quad (10)$$

where  $\mathcal{G}(\varphi) \equiv [\cdots \nabla_1 \ell(\hat{y}, y) \cdots] \in \mathbb{R}^{n_q |\mathcal{T}|}$  stacks all gradients of the losses on query examples as a vector. Hence, we establish the Polyak-Lojasiewicz (PL) inequality [7] as follows

$$\begin{aligned} \|\nabla_{\varphi} \mathcal{L}_{\text{meta}}(\varphi)\|^2 &= \frac{1}{|\mathcal{T}|^2} \|\mathcal{G}(\varphi)^{\top} \nabla_{\varphi} \mathcal{M}(\varphi)\|^2 \\ &= \frac{1}{|\mathcal{T}|^2} \mathcal{G}(\varphi)^{\top} \nabla_{\varphi} \mathcal{M}(\varphi) \nabla_{\varphi}^{\top} \mathcal{M}(\varphi) \mathcal{G}(\varphi) \\ &\geq \frac{\mu}{|\mathcal{T}|^2} \|\mathcal{G}(\varphi)\|^2 \quad (\text{uniform conditioning}) \\ &= \frac{\mu}{|\mathcal{T}|^2} \sum_{\tau \in \mathcal{T}} \sum_{(\mathbf{x}, y) \in Q_{\tau}} (\nabla_1 \ell(\hat{y}, y))^2 \\ &\geq \frac{\mu \rho}{2|\mathcal{T}|^2} \sum_{\tau \in \mathcal{T}} \sum_{(\mathbf{x}, y) \in Q_{\tau}} (\ell(\hat{y}, y) - \min_{y'} \ell(y', y)) \quad (\text{strongly convex}) \\ &\geq \frac{\mu \rho}{2|\mathcal{T}|} \left( \mathcal{L}_{\text{meta}}(\varphi) - \min_{\varphi} \mathcal{L}_{\text{meta}}(\varphi) \right). \end{aligned}$$

The PL inequality is commonly used in proving the global convergence of nonconvex optimization [5, 6]. Then,  $\min_{1 \leq t \leq T} \mathbb{E} \mathcal{L}_{\text{meta}}(\varphi_t) - \min_{\varphi} \mathcal{L}_{\text{meta}}(\varphi) = \mathcal{O}(\sigma_{\mathbf{g}}^2 / \sqrt{T})$  follows directly from Theorem 1.

For full gradient descent, the gradient noise  $\zeta_t = \nabla_{\varphi_t} \mathcal{L}_{\text{meta}}(\varphi_t) - \frac{1}{b} \sum_{\tau \in \mathcal{B}_t} \mathbf{g}_{\tau} = \mathbf{0}$ , thus, the noisy gradient will be the true gradient. By the Taylor expansion, it follows that

$$\begin{aligned} &\mathcal{L}_{\text{meta}}(\varphi_{t+1}) - \min_{\varphi} \mathcal{L}_{\text{meta}}(\varphi) \\ &\leq \mathcal{L}_{\text{meta}}(\varphi_t) + \nabla_{\varphi_t}^{\top} \mathcal{L}_{\text{meta}}(\varphi_t) (\varphi_{t+1} - \varphi_t) + \frac{\beta_{\text{meta}}}{2} \|\varphi_{t+1} - \varphi_t\|^2 - \min_{\varphi} \mathcal{L}_{\text{meta}}(\varphi) \\ &= \mathcal{L}_{\text{meta}}(\varphi_t) - \eta \|\nabla_{\varphi_t} \mathcal{L}_{\text{meta}}(\varphi_t)\|^2 + \frac{\eta^2 \beta_{\text{meta}}}{2} \|\nabla_{\varphi_t} \mathcal{L}_{\text{meta}}(\varphi_t)\|^2 - \min_{\varphi} \mathcal{L}_{\text{meta}}(\varphi) \\ &\leq \left( 1 - \frac{\eta \mu \rho}{4|\mathcal{T}|} \right) (\mathcal{L}_{\text{meta}}(\varphi_t) - \min_{\varphi} \mathcal{L}_{\text{meta}}(\varphi)), \end{aligned}$$

and we obtain the exponential convergence.  $\square$

## 2 Additional Experiments

### 2.1 Compared with MAML using a wide network on *Sine*

As the network width is critical to MAML, we perform few-shot regression experiments on *Sine* using the setting in [10]. We compare MetaProx with MAML that uses a larger (denoted by LargeMAML) and wider (denoted by VeryWideMAML) network. As can be seen from Table 1, MetaProx achieves the best performance.

### 2.2 MetaProx with RBF kernel on *Sine*

In this section, we evaluate the performance of MetaProx with the radial basis function (RBF) kernel on *Sine*. The RBF kernel is  $\mathcal{K}(\mathbf{x}_1, \mathbf{x}_2) = \exp\left(-\frac{\|\mathbf{x}_1 - \mathbf{x}_2\|^2}{2\sigma^2}\right)$ , where  $\sigma > 0$ . Table 2 reports the results when  $\sigma$  varies from  $\{0.01, 0.05, 0.1, 0.5, 1.0, 5.0\}$ . As can be seen, a simple linear kernel is better.

Table 1: Average MSE (with 95% confidence intervals) of few-shot regression on *Sine* using the settings in [10]. Results of baselines are from [10].

| method              | 5-shot                              | 10-shot                             |
|---------------------|-------------------------------------|-------------------------------------|
| OriginalMAML [3]    | $0.390 \pm 0.156$                   | $0.114 \pm 0.010$                   |
| LargeMAML           | $0.208 \pm 0.009$                   | $0.061 \pm 0.004$                   |
| VeryWideMAML        | $0.205 \pm 0.013$                   | $0.059 \pm 0.010$                   |
| MetaFun [10]        | $0.040 \pm 0.008$                   | $0.017 \pm 0.005$                   |
| MetaProx (proposed) | <b><math>0.010 \pm 0.001</math></b> | <b><math>0.002 \pm 0.001</math></b> |

Table 2: Average MSE (with 95% confidence intervals) of MetaProx with different base kernels on *Sine* (noise-free).

| kernel     | 2-shot                            | 5-shot                            |
|------------|-----------------------------------|-----------------------------------|
| RBF (0.01) | $2.92 \pm 0.19$                   | $2.78 \pm 0.18$                   |
| RBF (0.05) | $2.72 \pm 0.18$                   | $2.36 \pm 0.17$                   |
| RBF (0.1)  | $2.50 \pm 0.17$                   | $2.25 \pm 0.14$                   |
| RBF (0.5)  | $2.38 \pm 0.16$                   | $1.71 \pm 0.13$                   |
| RBF (1.0)  | $2.36 \pm 0.16$                   | $1.68 \pm 0.12$                   |
| RBF (5.0)  | $2.38 \pm 0.15$                   | $1.72 \pm 0.13$                   |
| linear     | <b><math>0.11 \pm 0.01</math></b> | <b><math>0.01 \pm 0.00</math></b> |

## References

- [1] J. C. Duchi. Introductory lectures on stochastic optimization. *The mathematics of data*, 25:99, 2018.
- [2] A. Fallah, A. Mokhtari, and A. Ozdaglar. On the convergence theory of gradient-based model-agnostic meta-learning algorithms. In *International Conference on Artificial Intelligence and Statistics*, pages 1082–1092, 2020.
- [3] C. Finn, P. Abbeel, and S. Levine. Model-agnostic meta-learning for fast adaptation of deep networks. In *International Conference on Machine Learning*, pages 1126–1135, 2017.
- [4] S. Ghadimi and G. Lan. Stochastic first- and zeroth-order methods for nonconvex stochastic programming. *SIAM Journal on Optimization*, 23(4):2341–2368, 2013.
- [5] H. Karimi, J. Nutini, and M. Schmidt. Linear convergence of gradient and proximal-gradient methods under the polyak-łojasiewicz condition. In *Joint European Conference on Machine Learning and Knowledge Discovery in Databases*, pages 795–811. Springer, 2016.
- [6] C. Liu, L. Zhu, and M. Belkin. Toward a theory of optimization for over-parameterized systems of non-linear equations: the lessons of deep learning. Preprint arXiv:2003.00307, 2020.
- [7] B. T. Polyak. Gradient methods for minimizing functionals. *Zhurnal Vychislitel’noi Matematiki i Matematicheskoi Fiziki*, 3(4):643–653, 1963.
- [8] S. J. Reddi, A. Hefny, S. Sra, B. Póczos, and A. Smola. Stochastic variance reduction for nonconvex optimization. In *International Conference on Machine Learning*, pages 314–323, 2016.
- [9] W. Rudin. *Principles of Mathematical Analysis*. McGraw-Hill, New York, 1976.
- [10] J. Xu, J.-F. Ton, H. Kim, A. Kosiorek, and Y. W. Teh. MetaFun: Meta-learning with iterative functional updates. In *International Conference on Machine Learning*, pages 10617–10627, 2020.
- [11] P. Zhou, X. Yuan, H. Xu, S. Yan, and J. Feng. Efficient meta learning via minibatch proximal update. In *Neural Information Processing Systems*, pages 1534–1544, 2019.
